# Supplementary material for: Transcriptome analysis of the effect of diosgenin on autoimmune thyroiditis in a rat model
Source: Sci Rep. 2021 Mar 18;11:6401. doi: 10.1038/s41598-021-85822-1 (PMC7973441; doi:10.1038/s41598-021-85822-1)
Supplement: Supplementary file 1 — Supplementary Information [file 41598_2021_85822_MOESM1_ESM.docx]

**Transcriptome Analysis of the Effect of Diosgenin on Autoimmune Thyroiditis in a Rat Model**

Chengfei Zhang1#, Lingling Qin2#, Boju Sun1, You Wu1, Fengying Zhong1, Lili Wu3, Tonghua Liu3*

1Dongfang Hospital of Beijing University of Chinese Medicine, Beijing, China

2Technology Department, Beijing University of Chinese Medicine, Beijing, China

3Key Laboratory of TCM Health Cultivation of Beijing, Beijing University of Chinese Medicine, Beijing, China

**#**Chengfei Zhang and Lingling Qin contribute equally to this work and co-first authors.

*** Correspondence:** Corresponding Author: Prof. Liu Tonghua. thliu@vip.163.com

RNA quality inspection results of rat thyroid tissue

| NO | Sample | concentration（μg/μl） | A260/280 | A260/230 | Volume (μl) | total（μg） | 28S/18S | RIN | score |
| --- | --- | --- | --- | --- | --- | --- | --- | --- | --- |
|
| 1 | Normal1 | 0.0343 | 1.94 | 1.89 | 10 | 0.34 | 1.6 | 8.1 | B |
| 2 | Normal2 | 0.1037 | 2.01 | 1.82 | 10 | 1.04 | 1.6 | 8.5 | A |
| 3 | Normal3 | 0.0439 | 1.88 | 1.87 | 10 | 0.44 | 1.3 | 8.6 | B |
| 4 | Normal4 | 0.0465 | 1.97 | 1.91 | 10 | 0.47 | 1.4 | 8.3 | B |
| 5 | Normal5 | 0.0411 | 2.04 | 1.81 | 10 | 0.41 | 1.4 | 8.3 | B |
| 6 | AIT-Model1 | 0.0538 | 2.00 | 1.85 | 10 | 0.54 | 1.4 | 8.3 | B |
| 7 | AIT-Model2 | 0.0318 | 1.83 | 1.85 | 10 | 0.32 | 1.6 | 8.2 | B |
| 8 | AIT-Model3 | 0.0327 | 1.91 | 1.81 | 10 | 0.33 | 1.4 | 8.4 | B |
| 9 | AIT-Model4 | 0.0637 | 2.04 | 1.85 | 10 | 0.64 | 1.5 | 8.6 | B |
| 10 | AIT-Model5 | 0.0702 | 2.09 | 1.89 | 10 | 0.70 | 1.6 | 8.7 | B |
| 11 | Diosgenin1 | 0.0928 | 2.18 | 1.89 | 25 | 2.32 | 1.5 | 8.7 | A |
| 12 | Diosgenin2 | 0.0664 | 2.06 | 1.87 | 10 | 0.66 | 1.5 | 8.6 | B |
| 13 | Diosgenin3 | 0.0764 | 2.10 | 1.80 | 10 | 0.76 | 1.5 | 8.7 | B |
| 14 | Diosgenin4 | 0.0411 | 2.00 | 1.84 | 10 | 0.41 | 1.8 | 8.7 | B |
| 15 | Diosgenin5 | 0.0826 | 2.10 | 1.85 | 10 | 0.83 | 1.5 | 8.6 | B |
